# Supplementary material
Source: publisher figshare collection journal article supplement (https://acs.figshare.com/ndownloader/files/5687403)
Supplement: Supplementary file 1 [file 5687403]

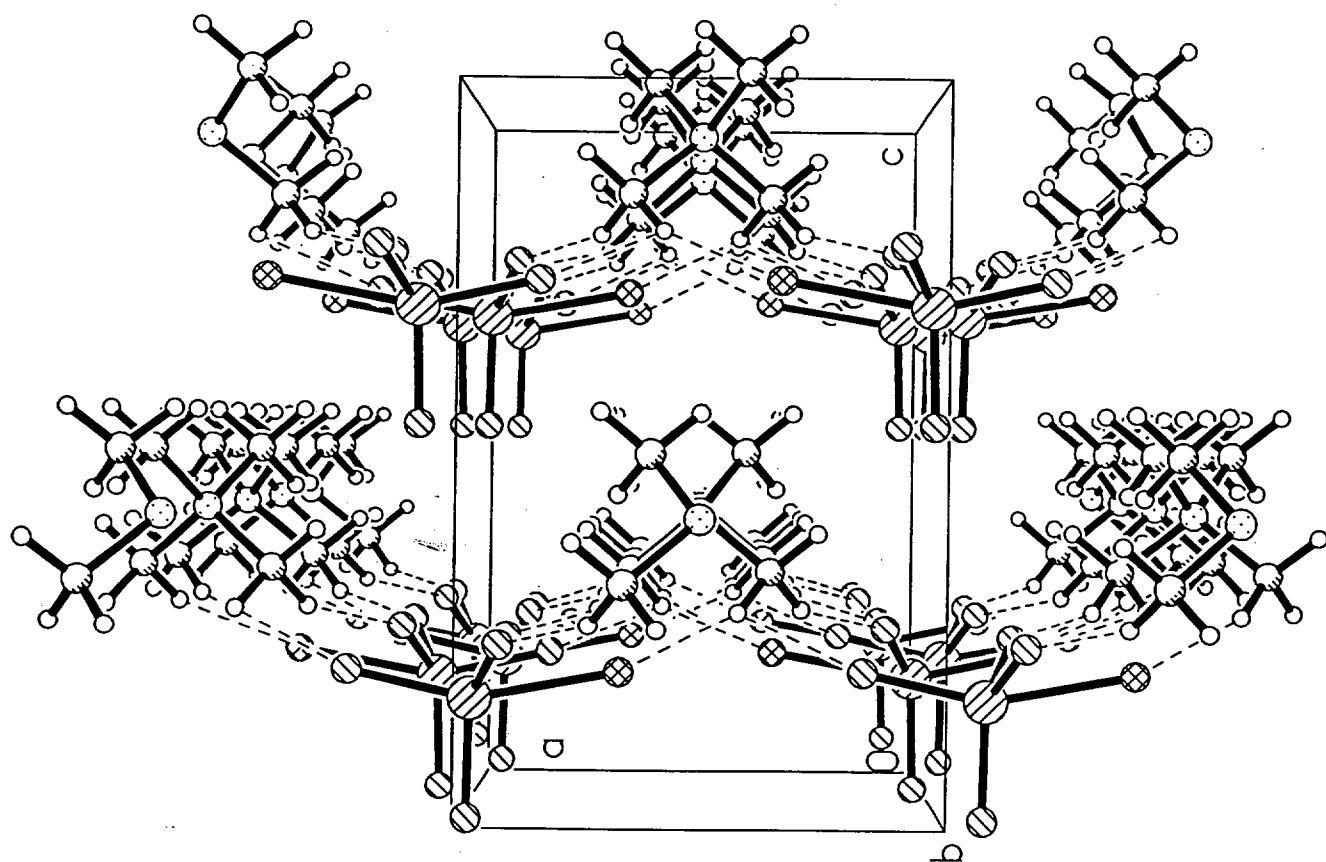

**Figure S6.** View of the  $[N(CH_3)_4][OsO_4F]$  unit cell showing the packing along the  $b$ -axis.

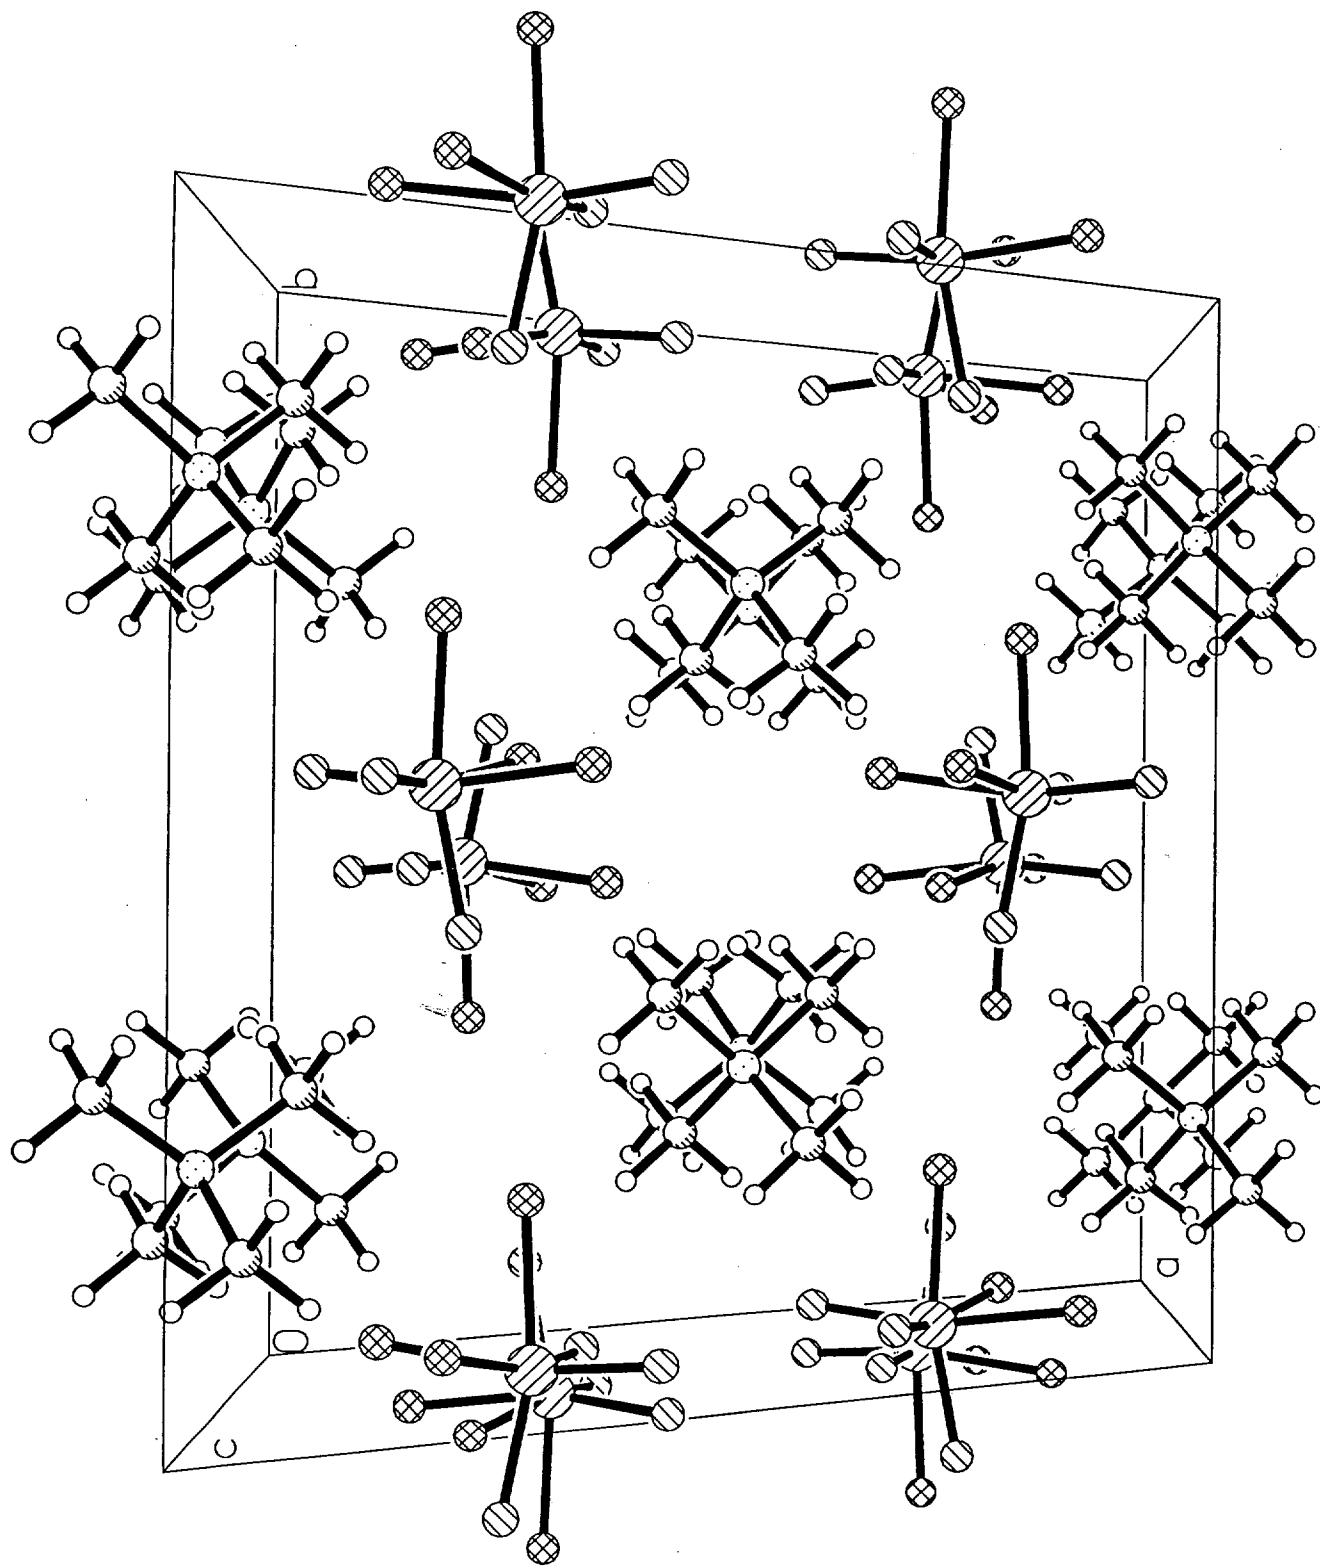

Figure S7. View of the  $[N(CH_3)_4][OsO_3F_3]$  unit cell showing the packing along the  $c$ -axis.

**Table S8.** Correlation Diagram for the Vibrational Modes of the a)  $\text{N}(\text{CH}_3)_4^+$  Cation and b)  $\text{OsO}_4\text{F}^-$  Anion in  $[\text{N}(\text{CH}_3)_4][\text{OsO}_4\text{F}]$ .<sup>a</sup>

|                               | Cation<br>Symmetry, $T_d$ | Site<br>Symmetry, $C_2$ | Crystal<br>Symmetry, $C_{2v}$ |                                                         |
|-------------------------------|---------------------------|-------------------------|-------------------------------|---------------------------------------------------------|
| $4(\nu_1 - \nu_3)$            | $A_1$                     | A                       | $A_1$ (Ra, IR)                | $2(\nu_1 - \nu_8), 2(\nu_9 - \nu_{19}), 2R, 2T$         |
| $4\nu_4$                      | $A_2$                     |                         | $A_2$ (Ra)                    | $2(\nu_1 - \nu_8), 2(\nu_9 - \nu_{19}), 2R, 2\tilde{T}$ |
| $4(\nu_5 - \nu_8)$            | E                         |                         |                               |                                                         |
| $4(\nu_9 - \nu_{12}), 4R$     | $T_1$                     |                         | $B_1$ (Ra, IR)                | $4(\nu_9 - \nu_{19}), 4R, 4T$                           |
| $4(\nu_{13} - \nu_{19}), 4T$  | $T_2$                     |                         | $B_2$ (Ra, IR)                | $4(\nu_9 - \nu_{19}), 4R, 4T$                           |
|                               |                           | B                       |                               |                                                         |
|                               | Anion<br>Symmetry, $C_s$  | Site<br>Symmetry, $C_s$ | Crystal<br>Symmetry, $C_{2v}$ |                                                         |
| $4(\nu_1 - \nu_8), 8T, 4R$    | $A'$                      | $A'$                    | $A_1$ (Ra, IR)                | $2(\nu_1 - \nu_8), 4T, 2R$                              |
|                               |                           |                         | $A_2$ (Ra, IR)                | $2(\nu_9 - \nu_{12}), 2T, 4R$                           |
| $4(\nu_9 - \nu_{12}), 4T, 8R$ | $A''$                     | $A''$                   | $B_1$ (Ra)                    | $2(\nu_1 - \nu_8), 4T, 2R$                              |
|                               |                           |                         | $B_2$ (Ra)                    | $2(\nu_9 - \nu_{12}), 2T, 4R$                           |

<sup>a</sup> Correlation of the free anion symmetry of  $\text{OsO}_4\text{F}^-$  ( $C_s$ ) to the anion site symmetry ( $C_s$ ) and the unit cell symmetry ( $C_{2v}$ ) (space group  $Abm2$ ) predicts that the  $A'$  modes of the free anion are each split into  $A_1$  and  $B_1$  components in the Raman and infrared spectra. The  $A''$  modes are expected to split into  $A_2$  and  $B_2$  components in the Raman spectrum while the splitting is not observed in the infrared spectrum. Correlation of the free cation symmetry of  $\text{N}(\text{CH}_3)_4^+$  ( $T_d$ ) to the cation site symmetry ( $C_2$ ) and the unit cell symmetry ( $C_{2v}$ ) predicts that all bands ( $\nu_1 - \nu_{19}$ ) are Raman and infrared active. In the Raman spectrum, the bands  $\nu_1 - \nu_8$  and  $\nu_9 - \nu_{19}$  are expected to be factor-group split into  $A_1$  and  $A_2$  and into  $A_1, A_2, B_1$ , and  $B_2$  components, respectively. In the infrared spectrum, the bands  $\nu_1 - \nu_8$  are not expected to be split while the bands  $\nu_9 - \nu_{19}$  are expected to split into  $A_1, B_1$ , and  $B_2$  components.

**Table S9.** Correlation Diagram for the Vibrational Modes of the a)  $\text{N}(\text{CH}_3)_4^+$  Cation and b)  $\text{OsO}_3\text{F}_3^-$  Anion in  $[\text{N}(\text{CH}_3)_4][\text{OsO}_3\text{F}_3]$ .<sup>a</sup>

|                               | Cation<br>Symmetry, $T_d$   | Site<br>Symmetry, $C_2$ | Crystal<br>Symmetry, $C_{2h}$ |                                                 |
|-------------------------------|-----------------------------|-------------------------|-------------------------------|-------------------------------------------------|
| $4(\nu_1 - \nu_3)$            | $A_1$                       | A                       | $A_g$ (Ra)                    | $2(\nu_1 - \nu_8), 2(\nu_9 - \nu_{19}), 2R, 2T$ |
| $4\nu_4$                      | $A_2$                       |                         | $B_g$ (Ra)                    | $4(\nu_9 - \nu_{19}), 4R, 4T$                   |
| $4(\nu_5 - \nu_8)$            | E                           |                         | $A_u$ (IR)                    | $2(\nu_1 - \nu_8), 2(\nu_9 - \nu_{19}), 2R, 2T$ |
| $4(\nu_9 - \nu_{12}), 4R$     | $T_1$                       |                         | $B_u$ (IR)                    | $4(\nu_9 - \nu_{19}), 4R, 4T$                   |
| $4(\nu_{13} - \nu_{19}), 4T$  | $T_2$                       |                         |                               |                                                 |
|                               |                             | B                       |                               |                                                 |
|                               |                             |                         |                               |                                                 |
|                               |                             |                         |                               |                                                 |
|                               | Anion<br>Symmetry, $C_{3v}$ | Site<br>Symmetry, $C_1$ | Crystal<br>Symmetry, $C_{2h}$ |                                                 |
| $8(\nu_1 - \nu_4), 8T$        | $A_1$                       | A                       | $A_g$ (Ra)                    | $2(\nu_1 - \nu_5), 4(\nu_6 - \nu_{11}), 6T, 6R$ |
|                               |                             |                         | $B_g$ (Ra)                    | $2(\nu_1 - \nu_5), 4(\nu_6 - \nu_{11}), 6T, 6R$ |
| $8\nu_5, 8R$                  | $A_2$                       |                         | $A_u$ (IR)                    | $2(\nu_1 - \nu_5), 4(\nu_6 - \nu_{11}), 6T, 6R$ |
|                               |                             |                         | $B_u$ (IR)                    | $2(\nu_1 - \nu_5), 4(\nu_6 - \nu_{11}), 6T, 6R$ |
| $8(\nu_6 - \nu_{11}), 8R, 8T$ | E                           |                         |                               |                                                 |

<sup>a</sup> Correlation of the free anion symmetry of  $\text{OsO}_3\text{F}_3^-$  ( $C_{3v}$ ) to the anion site symmetry ( $C_1$ ) and the unit cell symmetry ( $C_{2h}$ ) (space group  $C2/c$ ) predicts that all the vibrational bands are Raman and infrared active and are split into  $A_g$  and  $B_g$  components and into  $A_u$  and  $B_u$  components in the Raman and infrared spectrum, respectively. Correlation of the free cation symmetry of  $\text{N}(\text{CH}_3)_4^+$  ( $T_d$ ) to the cation site symmetry ( $C_2$ ) and the unit cell symmetry ( $C_{2h}$ ) predicts that all bands are Raman and infrared active. In the Raman and infrared spectra  $\nu_1 - \nu_8$  are not expected to show factor-group splitting, while  $\nu_9 - \nu_{19}$  are expected to be factor-group split into  $A_g$  and  $B_g$  components and into  $A_u$  and  $B_u$  components in the Raman and infrared spectrum, respectively.
